# Supplementary material for: A Unifying Framework for Evaluating the Predictive Power of Genetic Variants Based on the Level of Heritability Explained
Source: PubMed Central journal article supplement (PMC2996330; doi:10.1371/journal.pgen.1001230), 2010-12-02
Supplement: pgen.1001230.s012.pdf [file pgen.1001230.s012.pdf]

**Supplementary methods (Text S1) for "Evaluating the predictive power of genetic variants under a variance explained framework"**

**Hon-Cheong So and Pak C. Sham**

**1. Approximation of TPR, FPR and AUC by the binormal ROC curve**

Denote the measurable liability in affected and unaffected individuals by  $M_A$  and  $M_{\bar{A}}$  respectively. Suppose

$$M_A \sim N(\mu_A, \sigma_A^2) \quad \text{and} \quad M_{\bar{A}} \sim N(\mu_{\bar{A}}, \sigma_{\bar{A}}^2)$$

The AUC for the binormal ROC curve can be expressed in a simple form [1]:

$$AUC = \Phi \left( \frac{(\mu_A - \mu_{\bar{A}}) / \sigma_A}{\sqrt{1 + (\sigma_A / \sigma_{\bar{A}})^2}} \right)$$

The mean measurable liability in cases, or  $\mu_A$ , has been derived previously to be  $a\sigma^2$ , where  $a = \phi(T) / [1 - \Phi(T)]$  and  $\sigma^2$  is the variance explained. Since the overall liability is 0,

$$\mu_A K + \mu_{\bar{A}}(1 - K) = 0$$

$$a\sigma^2 K + \mu_{\bar{A}}(1 - K) = 0$$

$$\mu_{\bar{A}} = \frac{-a\sigma^2 K}{1 - K}$$

Hence

$$\mu_A - \mu_{\bar{A}} = a\sigma^2 \left( 1 + \frac{K}{1 - K} \right)$$

We may assume that the variances in the affected and unaffected groups are approximately equal, especially for more common diseases. AUC can then be approximated by the following formula:

$$AUC = \Phi \left( \frac{a\sigma^2 \left( 1 + \frac{K}{1 - K} \right) / \sigma_A}{\sqrt{2}} \right)$$

where  $\sigma_A$  is the standard deviation in cases which equals  $\sqrt{\sigma^2[1 - (1 - b)\sigma^2]}$  with  $b = 1 - a^2 + aT$ . This method of estimating AUC does not involve any numerical integration or simulations and can be easily implemented in a spreadsheet.

Alternatively, to improve the accuracy of AUC estimate, we may calculate  $\sigma_A / \sigma_{\bar{A}}$  using the actual standard deviations of liability (derived using the PA formula) in affected and

unaffected groups.

$$\frac{\sigma_A}{\sigma_{\bar{A}}} = \frac{\sqrt{1-(1-b)V}}{\sqrt{1-(1-d)V}}$$

with  $b$  and  $d$  as defined before in main text.

## 2. Probability density function of predicted risks

Let  $z$  denote the quantile of the measurable liability derived from the set of known genes, i.e.

$$z = \sigma\Phi^{-1}(p) \quad \text{and} \quad R = 1 - \Phi\left(\frac{T-z}{\sqrt{1-\sigma^2}}\right)$$

Then

$$\frac{dR}{dz} = -\phi\left(\frac{T-z}{\sqrt{1-\sigma^2}}\right)\left(-\frac{1}{\sqrt{1-\sigma^2}}\right) = \frac{\phi\left(\frac{T-\sigma\Phi^{-1}(p)}{\sqrt{1-\sigma^2}}\right)}{\sqrt{1-\sigma^2}}$$

$$\frac{dz}{dp} = \frac{\sigma}{\phi(\Phi^{-1}(p))}$$

$$\text{and} \quad \frac{dR}{dp} = \frac{dR}{dz} \left( \frac{dz}{dp} \right)$$

hence  $dp/dR$ , or the pdf of the absolute risk, can readily be obtained by taking the reciprocal.

Note also the formula to convert  $R$  to  $p$  is

$$p = \Phi\left[\frac{T - \Phi^{-1}(1-R)\sqrt{1-\sigma^2}}{\sigma}\right]$$

### *Risk distribution in affected and unaffected individuals*

Assume that again we wish to predict disease risks given a set of known susceptibility genes. However, in this case we would like to now how the *predicted* risks (not the actual risks, the actual risk can only be 0 or 1 if we know the affection status) will be distributed in affected and unaffected individuals.

$R$  is defined in the same way as above. Again we have

$$\frac{dR}{dz} = -\phi\left(\frac{T-z}{\sqrt{1-\sigma^2}}\right)\left(-\frac{1}{\sqrt{1-\sigma^2}}\right)$$

where  $\sigma^2$  is the variance explained by the known genes, but the distribution of  $z$  is different. In affected subjects,  $z$  may be written as

$$z = \Phi^{-1}(p)\sigma_A + \mu_A$$

where  $\sigma_A^2$  and  $\mu_A$  are the variance and mean of the measurable liability for affected

individuals.  $\mu_A = a\sigma^2$  and  $\sigma_A^2 = \sigma^2 [1-(1-b)\sigma^2]$  from previous results.  $dz/dp$  is given by

$$\frac{dz}{dp} = \frac{\sigma_A}{\phi(\Phi^{-1}(p))}$$

$dp/dR$  or the pdf of absolute risk can then be enumerated. For unaffected individuals, the calculation is very similar, only that the mean and variance equals  $c\sigma^2$  and  $\sigma^2[1-(1-d)\sigma^2]$  respectively.

### 3. Expression for AUC and Area under the curve when proportion of cases explained is plotted against population at the highest risk

We have previously derived the Pr(true positive) for a given percentile cut-off  $c$ . Test is defined as positive if the liability score exceeds this cut-off. The sensitivity of the test when the cut-off point is set at  $c$  is given by

$$sens(c) = \frac{\Pr(TP \text{ at } c)}{K} = \frac{\int_c^1 [1 - \Phi(\frac{T - \sigma\Phi^{-1}(p)}{\sqrt{1-\sigma^2}})] dp}{K}$$

Similarly, 1-specificity (or the false positive rate, FPR) is given by

$$1 - spec(c) = \frac{\Pr(FP \text{ at } c)}{1-K} = \frac{(1-c) - \int_c^1 [1 - \Phi(\frac{T - \sigma\Phi^{-1}(p)}{\sqrt{1-\sigma^2}})] dp}{1-K}$$

The AUC is the area under the curve when sensitivity is plotted against 1-specificity. This area is given by

$$AUC = \int_0^1 sens(c)d(1-spec(c))$$

$$\begin{aligned}
& \frac{d(1-spec(c))}{dc} \\
&= \left( \frac{1}{1-K} \right) \frac{d}{dc} \left( (1-c) - \int_c^1 [1 - \Phi(\frac{T - \sigma\Phi^{-1}(p)}{\sqrt{1-\sigma^2}})] dp \right) \\
&= \frac{1}{1-K} \left( -1 - \frac{d}{dc} \int_c^1 [1 - \Phi(\frac{T - \sigma\Phi^{-1}(p)}{\sqrt{1-\sigma^2}})] dp \right) \\
&= \frac{1}{1-K} \left( -1 - \frac{d}{dc} \left\{ \int_0^1 [1 - \Phi(\frac{T - \sigma\Phi^{-1}(p)}{\sqrt{1-\sigma^2}})] dp - \int_0^c [1 - \Phi(\frac{T - \sigma\Phi^{-1}(p)}{\sqrt{1-\sigma^2}})] dp \right\} \right) \\
&= \frac{1}{1-K} \left( -1 + \frac{d}{dc} \int_0^c [1 - \Phi(\frac{T - \sigma\Phi^{-1}(p)}{\sqrt{1-\sigma^2}})] dp \right) \\
&= \frac{1}{1-K} \left( -1 + [1 - \Phi(\frac{T - \sigma\Phi^{-1}(c)}{\sqrt{1-\sigma^2}})] \right) \\
&= \frac{-\Phi(\frac{T - \sigma\Phi^{-1}(c)}{\sqrt{1-\sigma^2}})}{1-K}
\end{aligned}$$

Note that  $\int_0^1 [1 - \Phi(\frac{T - \sigma\Phi^{-1}(p)}{\sqrt{1-\sigma^2}})] dp$  is independent of  $c$ , and hence the derivative of this expression is 0.

Now we can express AUC as

$$\begin{aligned}
AUC &= \int_0^1 sens(c) d(1-spec(c)) \\
&= \int_1^0 \left\{ \int_c^1 [1 - \Phi(\frac{T - \sigma\Phi^{-1}(p)}{\sqrt{1-\sigma^2}})] dp / K \times \left[ -\Phi(\frac{T - \sigma\Phi^{-1}(c)}{\sqrt{1-\sigma^2}}) / (1-K) \right] \right\} dc \\
&= \int_0^1 \left\{ \int_c^1 [1 - \Phi(\frac{T - \sigma\Phi^{-1}(p)}{\sqrt{1-\sigma^2}})] dp / K \times \left[ \Phi(\frac{T - \sigma\Phi^{-1}(c)}{\sqrt{1-\sigma^2}}) / (1-K) \right] \right\} dc
\end{aligned}$$

Note that when  $c=1$ , 1-specificity=0 and when  $c=0$ , 1-specificity=1, hence the change of integration limits on the 2<sup>nd</sup> line.

References:

1. Pepe MS (2003) The statistical evaluation of medical tests for classification and prediction. Oxford: Oxford University Press.
